# Supplementary material for: A dual passivation strategy based on F/N co-doped coal-based graphene quantum dots for high-efficiency carbon-based perovskite solar cells
Source: Royal Society of Chemistry journal article supplement (doi:10.1039/d3ta07226f), 2024-01-01
Supplement: d3ta07226f1.pdf [file d3ta07226f1.pdf]

## Supporting Information

### **Dual passivation strategy based on F/N co-doped coal-based graphene quantum dots for high-efficiency carbon-based perovskite solar cells**

Qixu Hu<sup>1,2</sup>, Ke Zhao<sup>1</sup>, Min Liu<sup>1</sup>, Salman Riaz<sup>1</sup>, Ying Qi, Peng Wei<sup>1</sup>, Jian

Cheng<sup>3</sup>, Yahong Xie<sup>\*,1</sup>

<sup>1</sup> Key Laboratory of Oil & Gas Fine Chemicals, Ministry of Education and Xinjiang Uyghur Autonomous Region, State Key Laboratory of Chemistry and Utilization of Carbon Based Energy Resources, College of Chemical Engineering, Xinjiang University, Urumqi 830017, P. R. China

<sup>2</sup> Zhejiang University-Hangzhou Global Scientific and Technological Innovation Center, Hangzhou 310014, P. R. China

<sup>3</sup> Department of Materials & Chemical Engineering, Hanyang University, Seoul 04763, South Korea

\*Corresponding author: Yahong Xie, E-mail: [xyh0707@xju.edu.cn](mailto:xyh0707@xju.edu.cn)

---

# Table of Contents

|                                                                                                                                                                                   |    |
|-----------------------------------------------------------------------------------------------------------------------------------------------------------------------------------|----|
| <b>1、 Experimental Section</b> .....                                                                                                                                              | 5  |
| 1.1 Materials.....                                                                                                                                                                | 5  |
| 1.2 Preparation of coal-based F/N-GQDs .....                                                                                                                                      | 5  |
| 1.3 Device fabrication .....                                                                                                                                                      | 5  |
| 1.4 Characterizations.....                                                                                                                                                        | 6  |
| <b>2 Supporting Figures</b> .....                                                                                                                                                 | 9  |
| <b>Fig. S1.</b> HR-TEM image of F/N-GQDs; Inset: the histogram of lateral size distribution. ....                                                                                 | 9  |
| <b>Fig. S2.</b> (a) XPS survey spectrum of N-GQDs and F/N-GQDs. (b) The corresponding high resolution XPS spectra of F 1s. ....                                                   | 9  |
| <b>Fig. S3.</b> (a) The corresponding high-resolution XPS spectra of Pb 4f from Dual film. ....                                                                                   | 10 |
| <b>Fig. S4.</b> Schematic diagram of perovskite film fabrication via In-situ passivation strategy, Post-treatment passivation strategy and Dual passivation strategy. ....        | 10 |
| <b>Fig. S5.</b> XPS spectra of the (a) Pristine (b) In-situ (c) Post and (d) Dual films. (e) I/Pb ratio from XPS data.....                                                        | 11 |
| <b>Figures S6.</b> Cross-section SEM images of different perovskite films. ....                                                                                                   | 11 |
| <b>Fig. S7.</b> Water contact angles of different perovskite films. ....                                                                                                          | 11 |
| <b>Fig. S8.</b> (a) 3D AFM images of different perovskite films; (b) The height curves vary with distance are recorded from the solid line of the corresponding 2D AFM image..... | 12 |
| <b>Fig. S9.</b> (a) UV-Vis absorption spectra and (b) Tauc plots of different perovskite films.....                                                                               | 13 |
| <b>Fig. S10.</b> Dark $J-V$ curves from (a) hole-only and (b) electron-only devices based on different perovskite films. ....                                                     | 13 |

|                                                                                                                                    |    |
|------------------------------------------------------------------------------------------------------------------------------------|----|
| <b>Fig. S11.</b> $J^{1/2}$ - $V$ curves from (a) hole-only and (b) electron-only devices based on different perovskite films. .... | 13 |
| <b>Fig. S12.</b> Carrier lifetime of four kinds of perovskite films on glass substrates. ....                                      | 14 |
| <b>Fig. S13.</b> Carrier lifetime of four kinds of perovskite films covered by the CEs. ....                                       | 14 |
| <b>Fig. S14.</b> UPS spectra of different perovskite films. ....                                                                   | 15 |
| <b>Fig. S15.</b> Schematic illustration of the Perovskite/Carbon interface. ....                                                   | 15 |
| <b>Fig. S16.</b> The $J$ - $V$ curves are normalized by $J_{sc}$ values. ....                                                      | 16 |
| <b>Fig. S17.</b> The curve of dark $J$ - $V$ . ....                                                                                | 16 |
| <b>Fig. S18.</b> Plots of $J_{ph}$ with respect to the $V_{eff}$ . ....                                                            | 17 |
| <b>Fig. S19.</b> Mott-Schottky plots of devices based on different perovskite layers. ....                                         | 17 |
| <b>Fig. S20.</b> $C$ - $V$ curves of devices based on different perovskite layers.....                                             | 18 |
| <b>Fig. S21.</b> $J$ - $V$ curves scanned both forward and reverse directions of devices based on different perovskite films. .... | 18 |
| <b>Fig. S22.</b> $C$ - $F$ curves of devices measured at a reverse potential of 0.8 V ..                                           | 19 |
| <b>Fig. S23.</b> Bode curves of devices measured at a reverse potential of 0.8 V                                                   | 19 |
| <b>Fig. S24.</b> OCVD of devices based on different perovskite films.....                                                          | 20 |
| <b>Fig. S25.</b> Electron lifetime curves of devices based on different perovskite films.....                                      | 20 |
| <b>Fig. S26.</b> The long-term stability of unpackaged C-PSCs under continuous MPP tracking.....                                   | 21 |
| <b>3 Supporting Tables</b> .....                                                                                                   | 22 |
| <b>Tables S1.</b> TRPL fitting parameters of perovskite films deposited on glass substrate.....                                    | 22 |
| <b>Tables S2.</b> TRPL fitting parameters of perovskite films covered by the CEs. ....                                             | 22 |

|                                                                                                                    |    |
|--------------------------------------------------------------------------------------------------------------------|----|
| <b>Tables S3.</b> Summary of the performance photovoltaic parameters of different devices.....                     | 22 |
| <b>4 Supporting Notes</b> .....                                                                                    | 23 |
| <b>Note S1.</b> Williamson-Hall analysis.....                                                                      | 23 |
| <b>Note S2.</b> Urbach energy calculation .....                                                                    | 23 |
| <b>Note S3.</b> Space-charge-limited-current (SCLC) analysis .....                                                 | 23 |
| <b>Note S4.</b> Thermal admittance spectroscopy (TAS) analysis .....                                               | 24 |
| <b>Note S5.</b> Time-resolved photoluminescence (TRPL) measurements and the calculation of carrier lifetimes ..... | 24 |
| <b>Note S6.</b> Calculation of carrier diffusion length ( $L_D$ ) .....                                            | 24 |
| <b>Note S7.</b> Ultraviolet photoelectron spectroscopy (UPS) analysis .....                                        | 25 |
| <b>Note S8.</b> Analysis of the slopes of the normalized $J$ - $V$ curves at each voltage .....                    | 25 |
| <b>Note S9.</b> Photocurrent density ( $J_{ph}$ ) versus effective voltage ( $V_{eff}$ ) analysis .....            | 26 |
| <b>Note S10.</b> Calculations of $R_s$ , $A$ and $J_0$ from $J$ - $V$ curves.....                                  | 26 |
| <b>Note S11.</b> Open-circuit photovoltage decay (OCVD) measurements .....                                         | 27 |
| <b>5 References for Supporting Information</b> .....                                                               | 28 |

# 1 1、 Experimental Section

## 2 1.1 Materials

3 Lead iodide ( $\text{PbI}_2$ ) ( $\geq 99.5\%$ ) methylammonium iodide (MAI) (99.9%) were  
4 purchased from Xi'an Polymer Light Technology Corp, N, N-dimethylformamide  
5 (DMF) (99.8%), dimethyl sulfoxide (DMSO) (99.9%), chlorobenzene (CB) (99%),  
6 ethyl acetate (99.5%) and  $\text{SnCl}_2 \cdot 2\text{H}_2\text{O}$  (99.99%) were obtained from Aladdin. FTO  
7 substrates were purchased from Ying Kou OPV Tech New Energy Co., Ltd., and Coal  
8 comes from Dahuangshan coal mine in Xinjiang, China. All chemical reagents were of  
9 analytical grade and used without further purification.

## 10 1.2 Preparation of coal-based F/N-GQDs

11 Coal-based F/N-GQDs were synthesized by our previously reported method[16]  
12 as shown in Figure 1(a). In short, the coal was pretreated and then condensed and  
13 refluxed with  $\text{H}_2\text{O}_2$  solution. After the condensing reflux was completed, the excess  
14  $\text{H}_2\text{O}_2$  solution was removed to obtain the F/N-GQDs aqueous solution. Then the  
15 solution was transferred to a 100 mL Teflon lined stainless steel autoclave, and 0.4 mol  
16  $\text{L}^{-1}$  HF solution was added and kept at 120 °C for 10 h. After that, the autoclave was  
17 naturally cooled down to room temperature. The obtained suspension was dialysed  
18 via a 0.22  $\mu\text{m}$  filter to remove large particles, and the purified solution is freeze-dried  
19 to obtain F/N-GQDs powder.

## 20 1.3 Device fabrication

21 In detail, the FTO glass substrate was continuously ultrasonicated in succession  
22 with deionized water (DI), isopropanol (IPA), and ethanol for 20 min., respectively.

1 Then it was dried by hot-air flowing and treated with a UV/ozone for 15 min. Next,  
2 SnO<sub>2</sub> precursor was spin-coated on the cleaned FTO substrate at 3000 rpm for 30 s and  
3 thermally annealed on a hot plate at 200°C for 60 min in ambient air. After that, the 159  
4 mg MAI and 461 mg PbI<sub>2</sub> were dissolved in a mixed solvent of 0.7 mL anhydrous DMF  
5 and DMSO (9:1, V/V) to obtain perovskite precursor solution. After cooling to room  
6 temperature, the obtained films were treated with UV/ozone for 15 min. The perovskite  
7 precursor was then deposited on the substrate at the speed of 4000 rpm for 30 s. Then  
8 450 μL ethyl acetate (without/with F/N-GQDs) was dropped at the center of the  
9 spinning substrate for 17 s before the end of spin-coating. For the post-treatment  
10 passivation of perovskite films, F/N-GQDs IPA solution was spin-coated at 3000 rpm  
11 for 30 s, followed by annealing at 80°C for 10 min. Subsequently, the commercial  
12 carbon paste (Japan JUJO chemical Co., Ltd) was coated on the perovskite layer with  
13 a thickness controlled by two layers of polyimide tape (60 μm), and the total thickness  
14 is 120 μm, and dried at 60°C for 10 min. The above operation was repeated twice to  
15 form CEs and complete the device preparation. All device fabrication processes were  
16 carried out under air condition with a temperature range of 20-25 °C and a relative  
17 humidity of 10-20%.

## 18 1.4 Characterizations

19 Microstructure of the F/N-GQDs was characterized by a high-resolution  
20 transmission electron microscopy (HRTEM, FEI Talos F200S). Both  
21 ultraviolet photoemission spectroscopy (UPS) and X-ray photoelectron spectroscopy

1 (XPS) analyses were performed by using a photoelectron spectrometer (Thermo Fisher,  
2 Escalab 250Xi). Steady-state Photoluminescence (PL) and time-resolved  
3 photoluminescence (TRPL) were all performed by FLS980 (Edinburgh Instruments  
4 Ltd.) with a picosecond pulsed diode laser (EPL-475) to study the carrier transport  
5 kinetics. Raman test was carried out using French HORIBA Scientific (Lab-RAM HR  
6 Evolution). Surface morphologies of the perovskite films and devices cross-sections  
7 were characterized by a field emission scanning electron microscope (SEM, SU8010,  
8 Hitachi), and the grain size of the perovskite film in the SEM image was measured by  
9 software (Nano Measurer). Wettability was analyzed using a contact angle analyzer  
10 (Dataphysics OCA20). Atomic force microscope (AFM, Bruker, Dimension Fast Scan)  
11 was used to analyze the surface roughness of the perovskite films. Crystallographic  
12 properties were characterized by X-ray diffraction (XRD, D8 Advance, BRUKER) at  
13  $Cu K_{\alpha}$  radiation of 40 mA and 45 kV ( $\lambda = 1.54056 \text{ \AA}$ ) in the range of 15-50°.  $J-V$  curves  
14 of C-PSCs were obtained in ambient air using a Keithley 2400 source meter under  
15 irradiation of simulated solar light intensity controlled at AM 1.5 G (100 mW cm<sup>-2</sup>).  
16 Light intensity was calibrated by a standard silicon solar cell that NREL certified. The  
17 effective area of C-PSCs was 0.08 cm<sup>2</sup>, which was defined using a black metallic mask.  
18 The electrochemical impedance spectroscopy (EIS) was carried out by CHI660D  
19 electrochemical workstation from 0.1 MHz-0.1 Hz frequency at a bias voltage of 0.8 V  
20 in the dark and its Nyquist curve was fitted by the Z-view software. TPV measurement  
21 was performed with a system excited by a 532 nm (1000 Hz, 3.2 ns) pulse laser. Before

1 testing, the devices were connected with a digital oscilloscope (DOS-X 3104A) and the  
2 internal impedance of the digital oscilloscope is set to  $1\text{M}\Omega$  to form an open-circuit  
3 condition. During the testing, the solar simulator provided steady-state illumination of  
4 100 mW  $\text{cm}^{-2}$ .



## 2 Supporting Figures

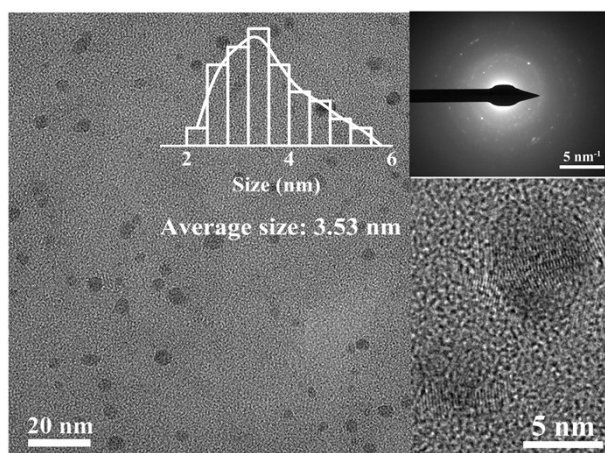

**Fig. S1.** HR-TEM image of F/N-GQDs; Inset: the histogram of lateral size distribution.

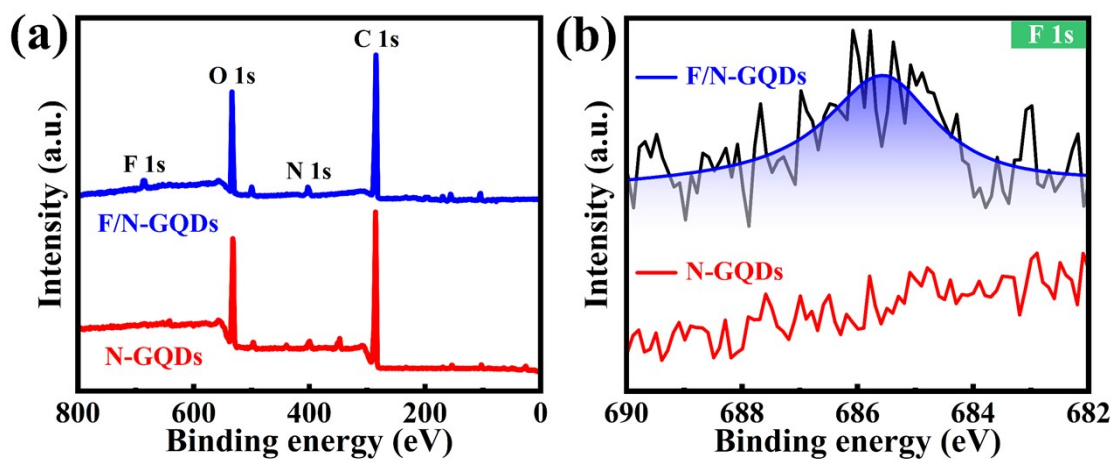

**Fig. S2.** (a) XPS survey spectrum of N-GQDs and F/N-GQDs. (b) The corresponding high resolution XPS spectra of F 1s.

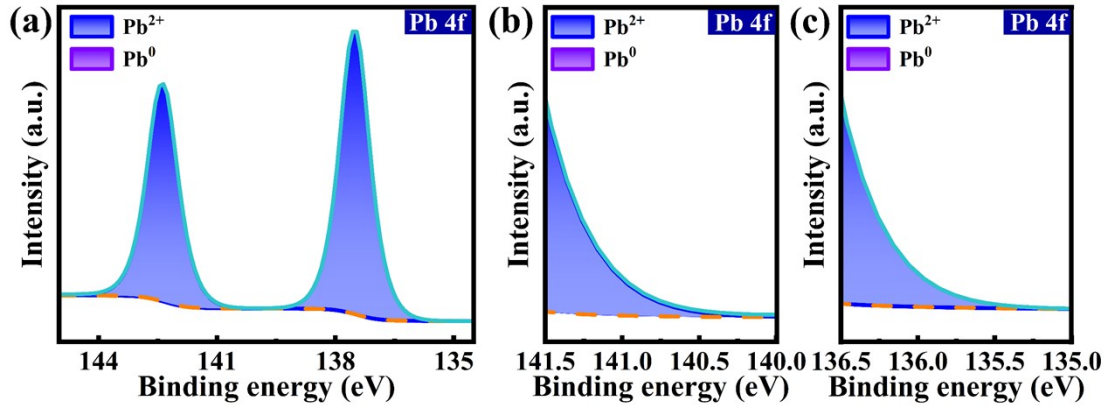

**Fig. S3.** (a) The corresponding high-resolution XPS spectra of Pb 4f from Dual film.

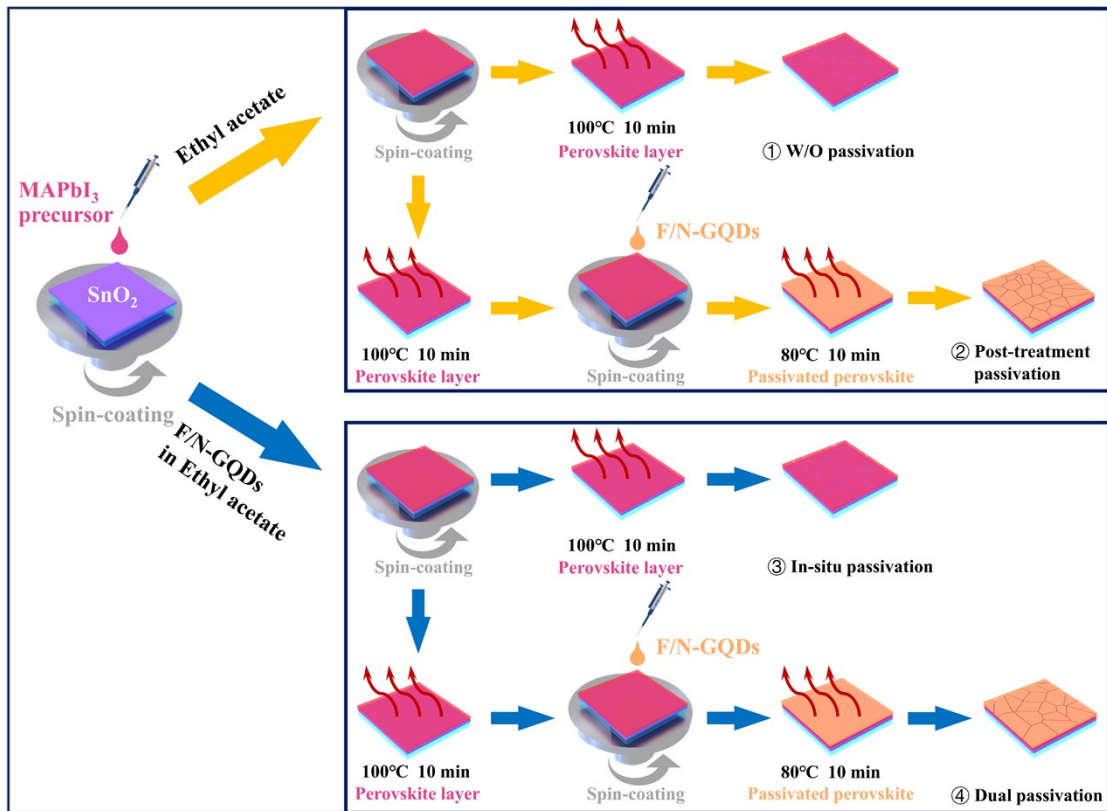

**Fig. S4.** Schematic diagram of perovskite film fabrication via In-situ passivation strategy, Post-treatment passivation strategy and Dual passivation strategy.

The corresponding films/devices based on the pristine MAPbI<sub>3</sub>, MAPbI<sub>3</sub> treated with in-situ passivation, post-treatment passivation, and dual passivation strategy are abbreviated to the Pristine film/device, In-situ film/device, Post film/device, and Dual film/device, respectively.

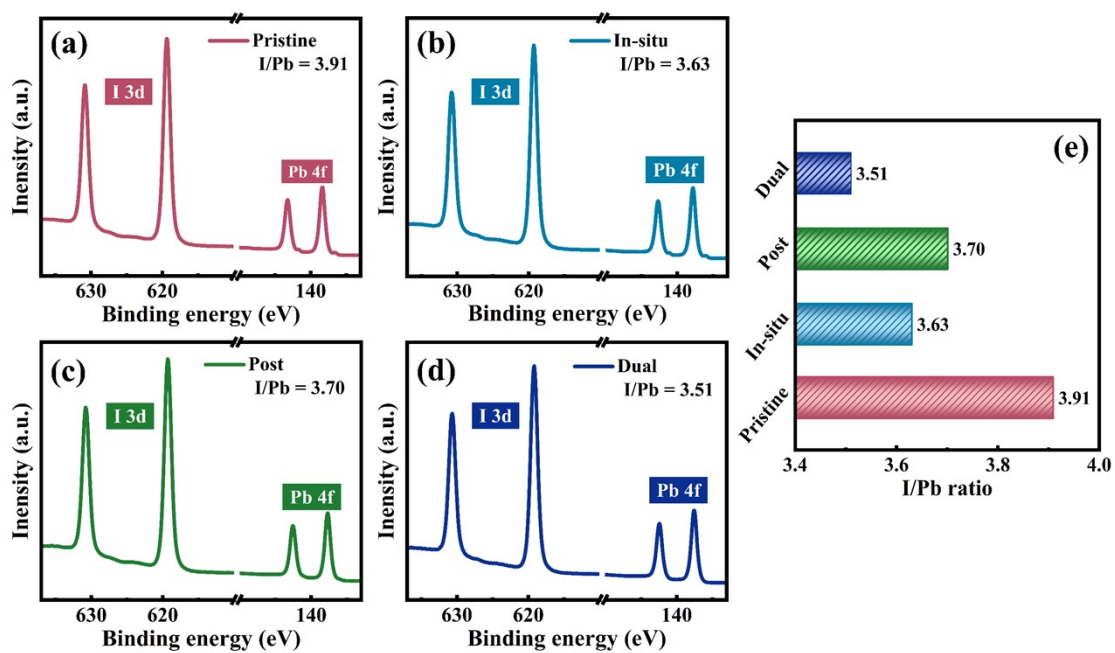

**Fig. S5.** XPS spectra of the (a) Pristine (b) In-situ (c) Post and (d) Dual films. (e) I/Pb ratio from XPS data.

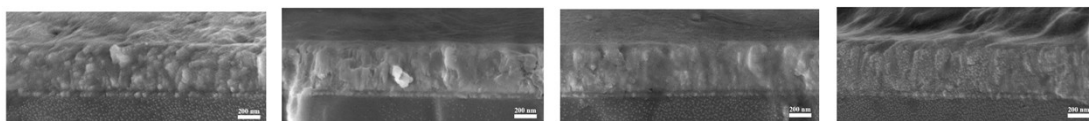

**Figures S6.** Cross-section SEM images of different perovskite films.

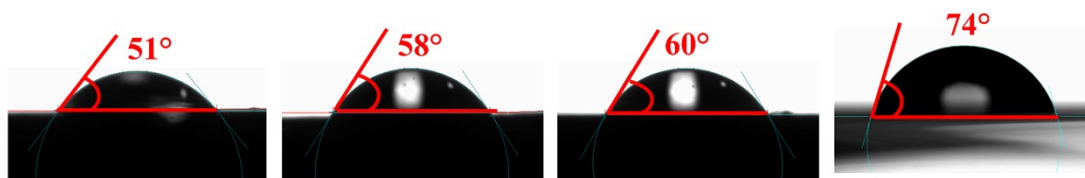

**Fig. S7.** Water contact angles of different perovskite films.

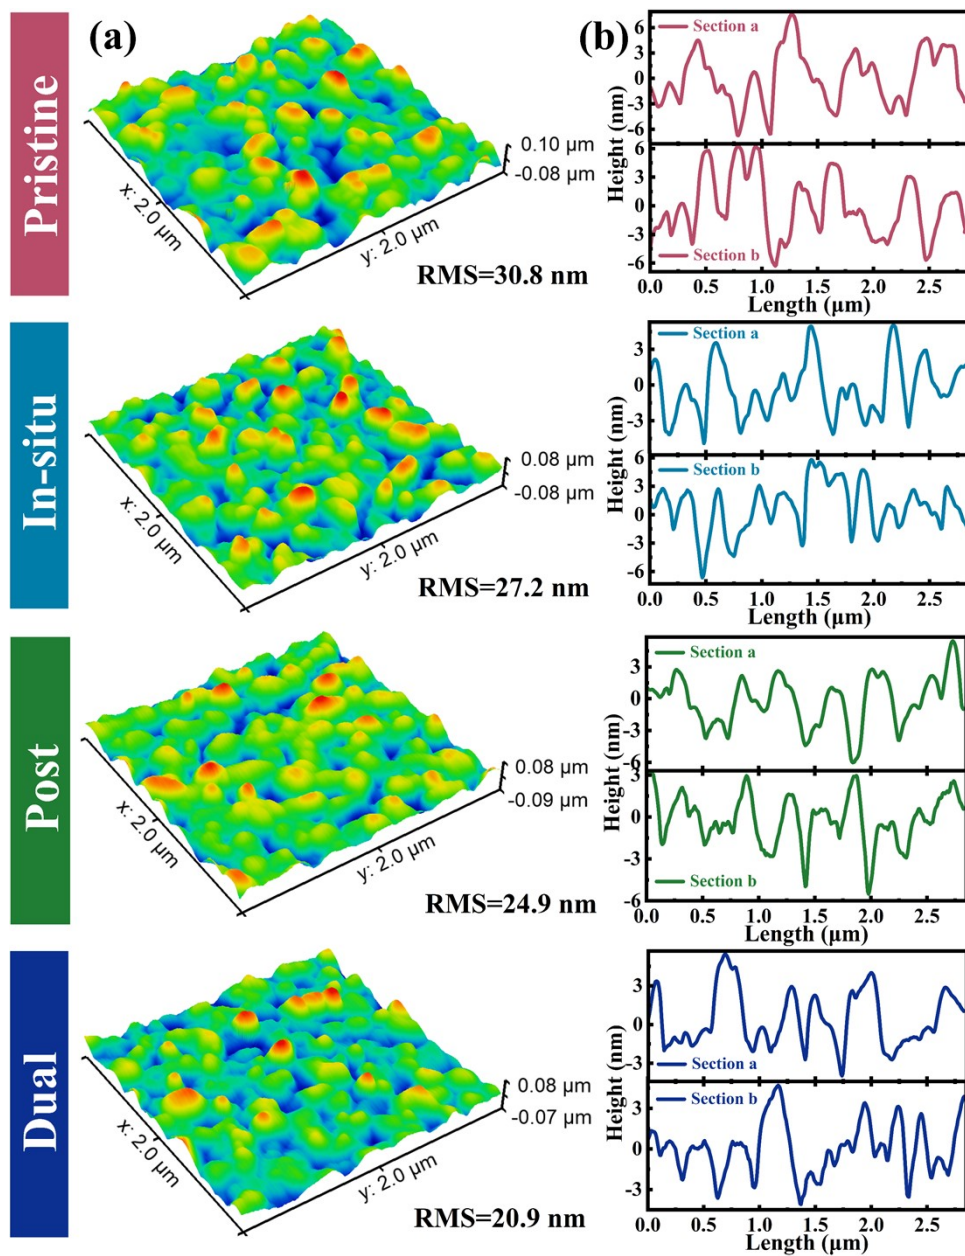

**Fig. S8.** (a) 3D AFM images of different perovskite films; (b) The height curves vary with distance are recorded from the solid line of the corresponding 2D AFM image.



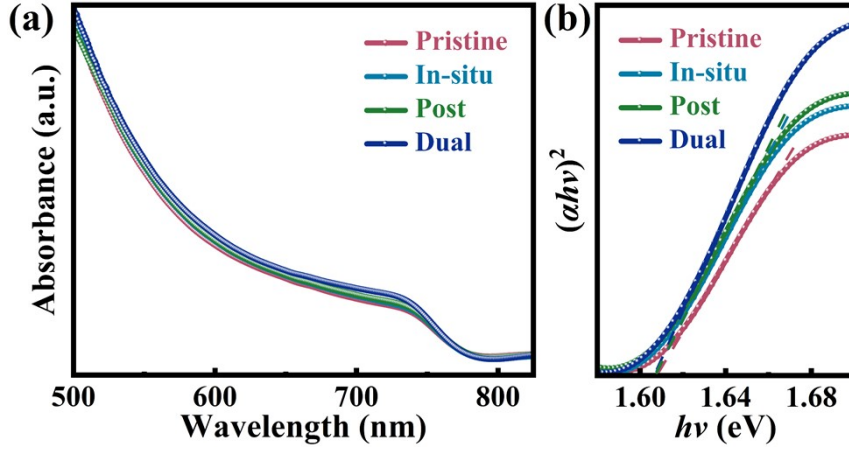

Fig. S9. (a) UV-Vis absorption spectra and (b) Tauc plots of different perovskite films.

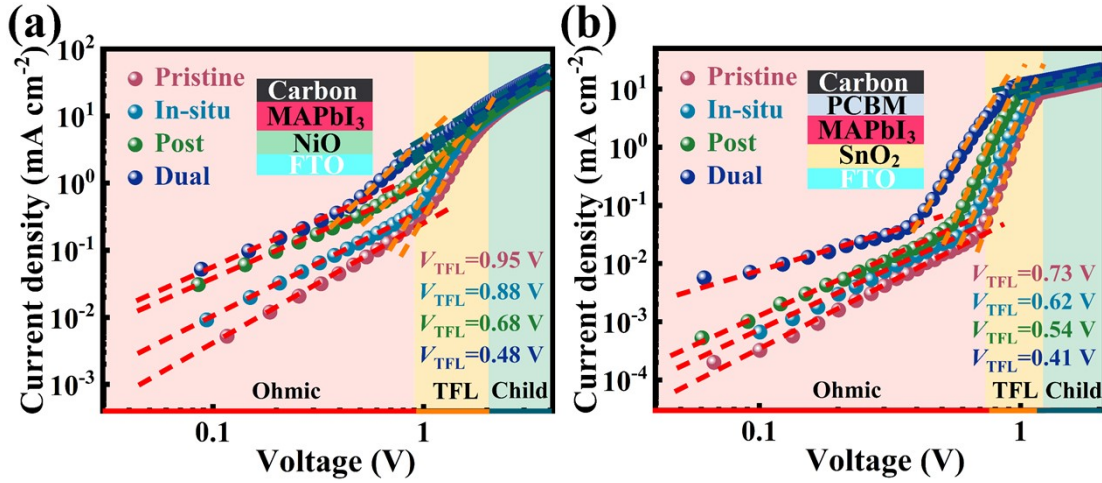

Fig. S10. Dark  $J$ - $V$  curves from (a) hole-only and (b) electron-only devices based on different perovskite films.

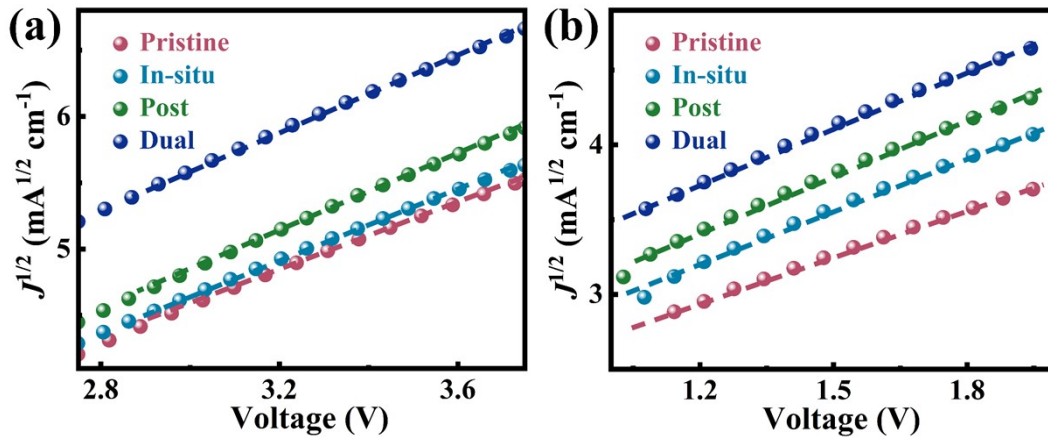

Fig. S11.  $J^{1/2}$ - $V$  curves from (a) hole-only and (b) electron-only devices based on different perovskite films.

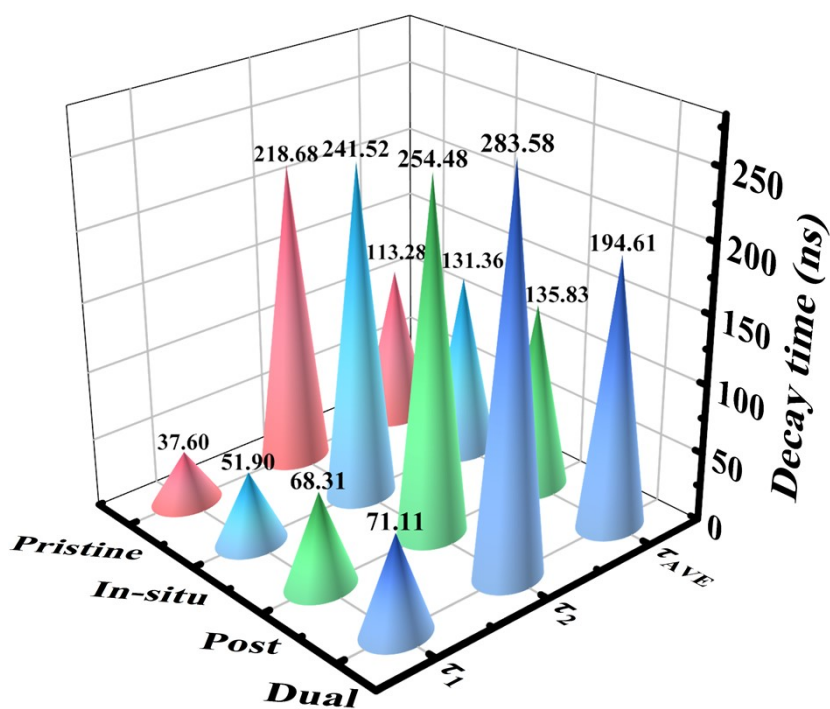

Fig. S12. Carrier lifetime of four kinds of perovskite films on glass substrates.

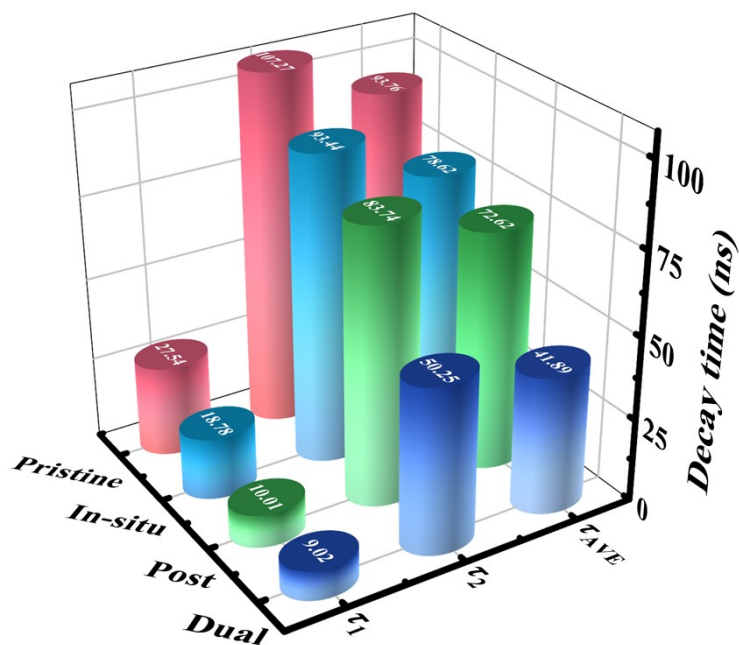

Fig. S13. Carrier lifetime of four kinds of perovskite films covered by the CEs.

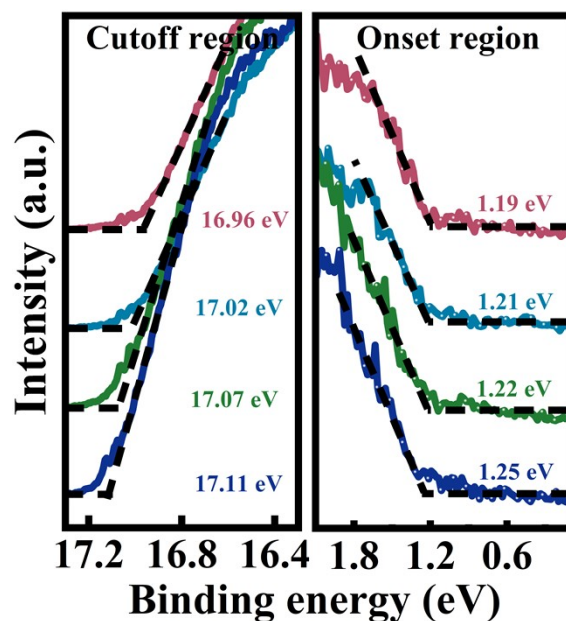

**Fig. S14.** UPS spectra of different perovskite films.

The passivation treatment of F/N-GQDs may also influence work function of perovskite films and the interface energy level alignment in the devices, where the energy level alignment is another key factor in determining the charge transport behaviors.

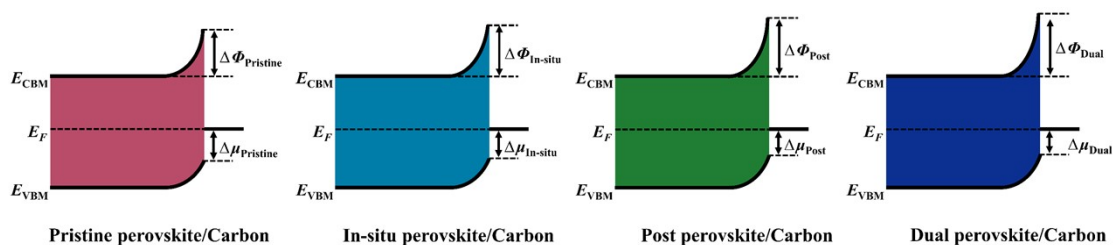

**Fig. S15.** Schematic illustration of the Perovskite/Carbon interface.

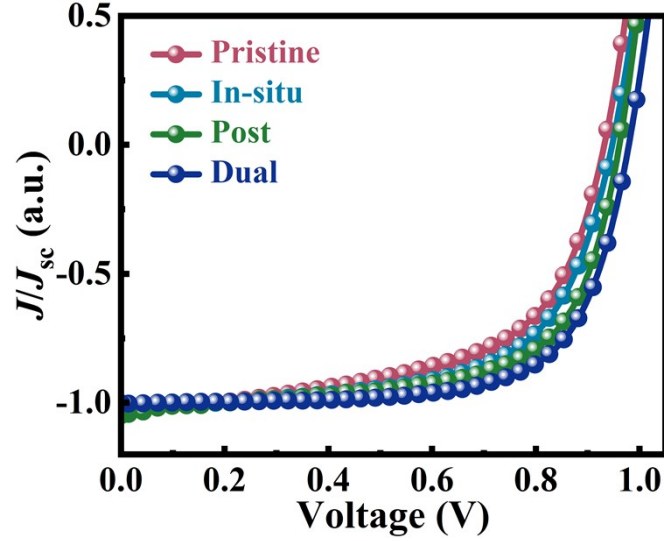

**Fig. S16.** The  $J$ - $V$  curves are normalized by  $J_{sc}$  values.

The high field and the low field represents the short circuit (SC) and the open circuit (OC) condition, respectively, to compare the field dependent behavior from SC to MPP. At SC, the steep slope suggests that the charge collection is strongly field dependent.

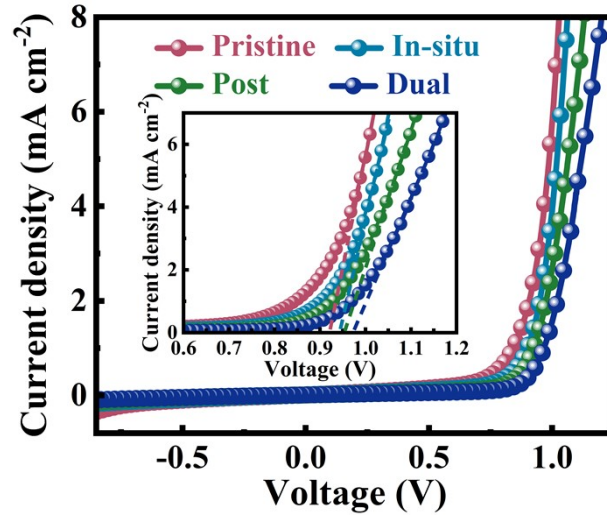

**Fig. S17.** The curve of dark  $J$ - $V$ .

Based on the intercept between the linear part of the curves and the horizontal axis, the values of  $V_{oc}$  can be estimated to be 0.923 V (Pristine device), 0.944 V (In-situ device), 0.957 V (Post device) and 0.976 V (Dual device), respectively, confirming that the passivated devices have a higher intrinsic  $V_{oc}$ <sup>1</sup>.



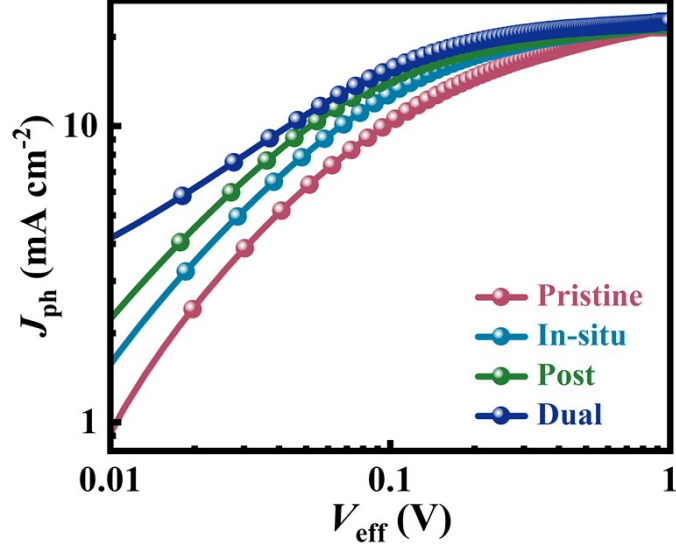

Fig. S18. Plots of  $J_{ph}$  with respect to the  $V_{eff}$ .

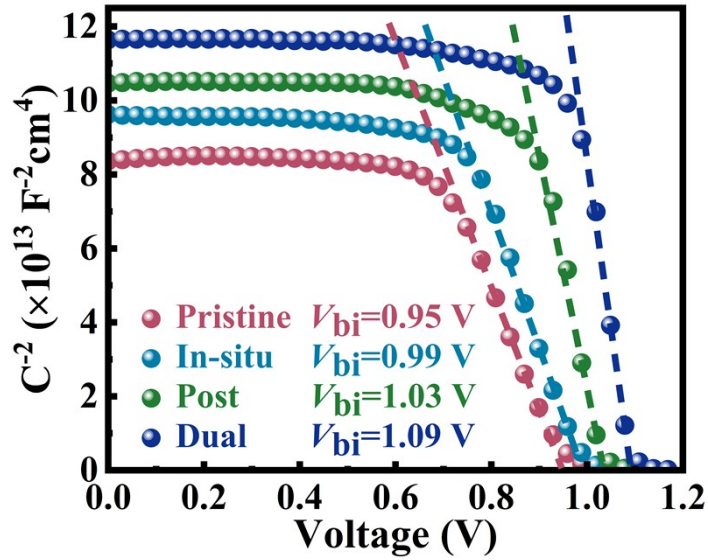

Fig. S19. Mott-Schottky plots of devices based on different perovskite layers.

The  $C$ - $V$  measurements under dark conditions was analyzed using Mott-Schottky equation:

$$\frac{1}{C^2} = \frac{2}{q\epsilon\epsilon_0 N} \left( V - V_{bi} - \frac{K_B T}{q} \right)$$

where the built-in potential ( $V_{bi}$ ) can be extracted from the intercept of  $C^{-2}$  versus the applied voltage  $V$ , and the charge carrier density can be obtained from the slope, thereby revealing the accumulation/extraction of charge between the perovskite

layer/CE.

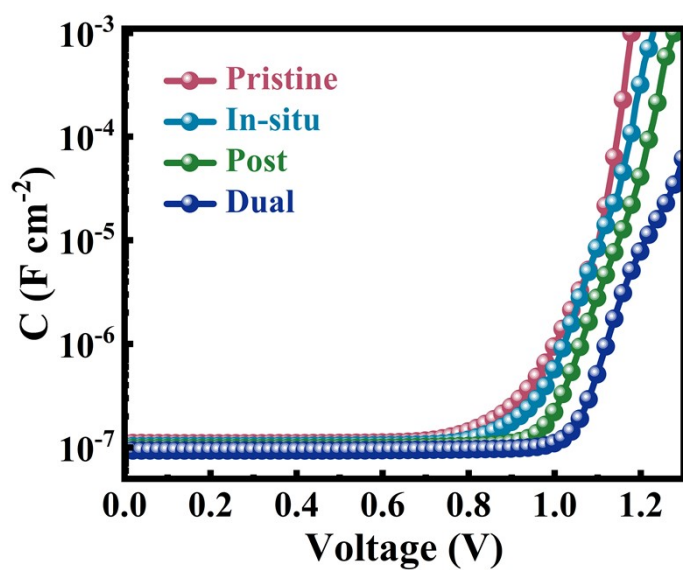

Fig. S20.  $C$ - $V$  curves of devices based on different perovskite layers

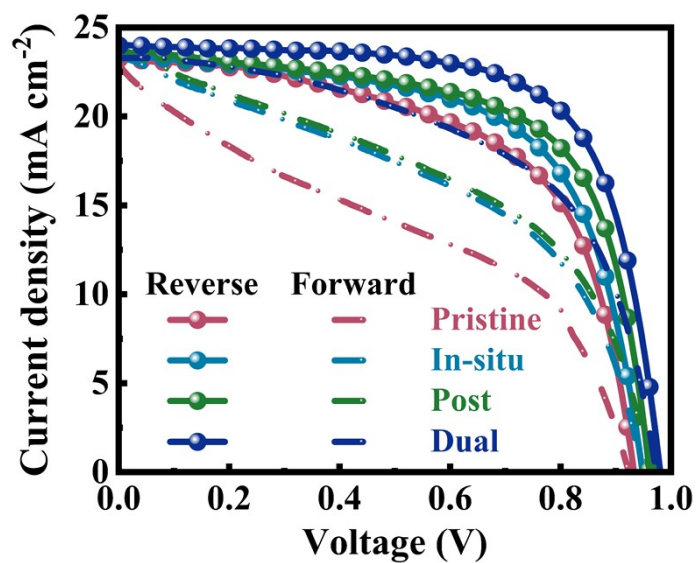

Fig. S21.  $J$ - $V$  curves scanned both forward and reverse directions of devices based on different perovskite films.

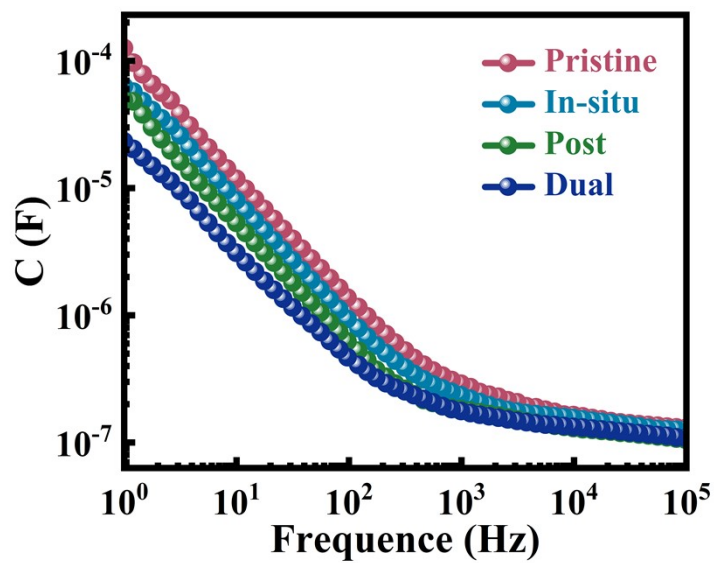

Fig. S22.  $C$ - $F$  curves of devices measured at a reverse potential of 0.8 V

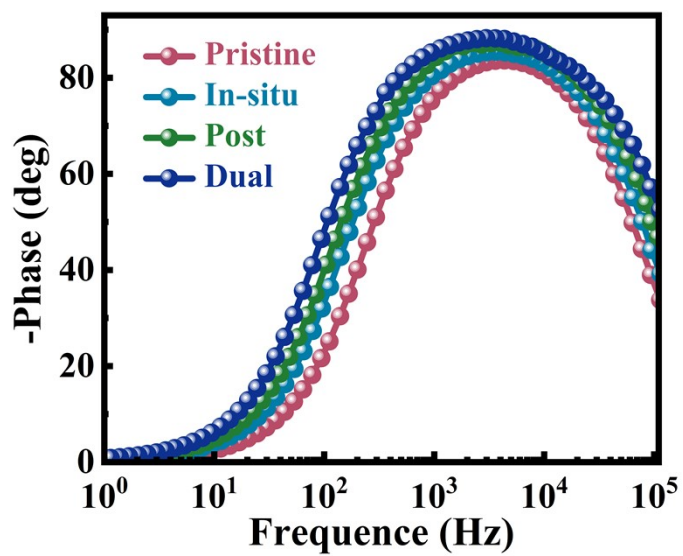

Fig. S23. Bode curves of devices measured at a reverse potential of 0.8 V

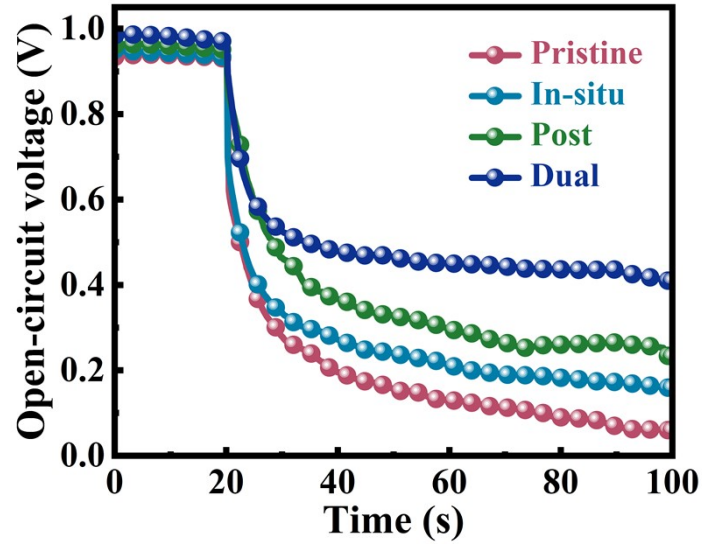

Fig. S24. OCVD of devices based on different perovskite films.

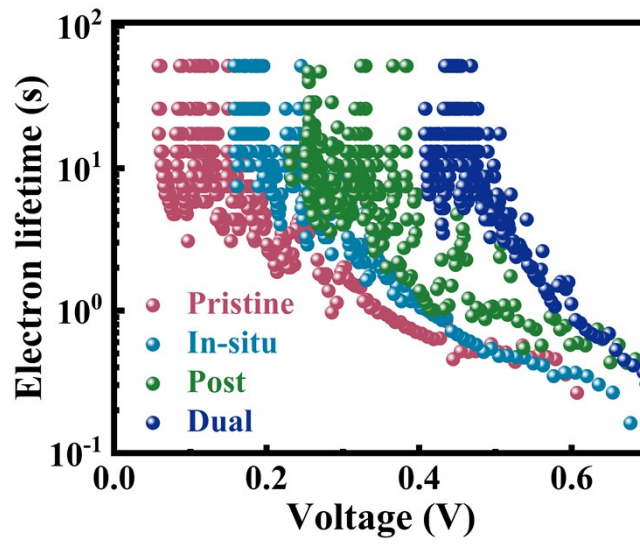

Fig. S25. Electron lifetime curves of devices based on different perovskite films.

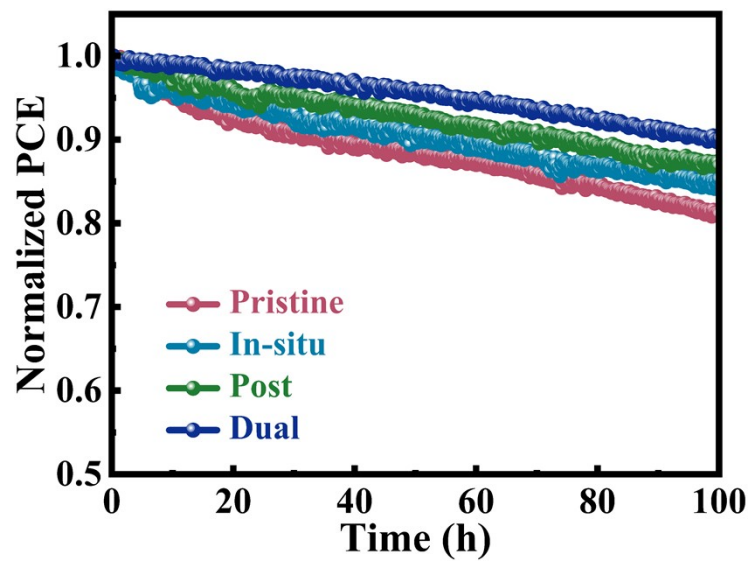

Fig. S26. The long-term stability of unpackaged C-PSCs under continuous MPP tracking.

### 3 Supporting Tables

| Sample   | $A_1$ (%) | $\tau_1$ (ns) | $A_2$ (%) | $\tau_2$ (ns) | $\tau_{AVE}$ (ns) |
|----------|-----------|---------------|-----------|---------------|-------------------|
| Pristine | 89.01     | 37.60         | 10.99     | 218.68        | 113.28            |
| In-situ  | 86.58     | 51.90         | 13.42     | 241.52        | 131.36            |
| Post     | 86.75     | 68.31         | 13.25     | 254.48        | 135.83            |
| Dual     | 74.18     | 71.11         | 25.82     | 283.58        | 194.61            |

**Tables S1.** TRPL fitting parameters of perovskite films deposited on glass substrate.

| Sample   | $A_1$ (%) | $\tau_1$ (ns) | $A_2$ (%) | $\tau_2$ (ns) | $\tau_{AVE}$ (ns) |
|----------|-----------|---------------|-----------|---------------|-------------------|
| Pristine | 44.27     | 27.54         | 55.73     | 107.27        | 93.76             |
| In-situ  | 55.20     | 18.78         | 44.80     | 93.44         | 78.62             |
| Post     | 59.78     | 10.01         | 40.22     | 83.74         | 72.62             |
| Dual     | 58.63     | 9.02          | 41.37     | 50.25         | 41.89             |

**Tables S2.** TRPL fitting parameters of perovskite films covered by the CEs.

| Device   |         | $V_{oc}$ (V) | $J_{sc}$ (mA cm <sup>-2</sup> ) | FF (%)     | PCE (%)    |
|----------|---------|--------------|---------------------------------|------------|------------|
| Pristine | Best    | 0.935        | 22.88                           | 60.17      | 12.87      |
|          | Average | 0.932±0.005  | 22.46±0.30                      | 56.39±2.44 | 11.80±0.59 |
| In-situ  | Best    | 0.949        | 22.96                           | 64.36      | 14.04      |
|          | Average | 0.947±0.004  | 22.80±0.24                      | 61.63±1.62 | 13.30±0.39 |
| Post     | Best    | 0.963        | 23.05                           | 66.56      | 14.77      |
|          | Average | 0.956±0.006  | 23.04±0.27                      | 63.51±1.49 | 13.99±0.37 |
| Dual     | Best    | 0.983        | 23.88                           | 69.88      | 16.37      |
|          | Average | 0.977±0.006  | 23.37±0.27                      | 67.12±1.78 | 15.34±0.50 |

**Tables S3.** Summary of the performance photovoltaic parameters of different devices.

## 1 **4 Supporting Notes**

### 2 **Note S1.** Williamson-Hall analysis

3 The lattice strain and crystallite size of perovskite films were calculated from XRD  
4 patterns using the Williamson-Hall analysis<sup>2</sup>:

$$5 \quad \beta \cos \theta = 4\varepsilon \sin \theta + \frac{K\lambda}{D} \quad (9)$$

6 Where  $\beta$  is the full width at half maximum (FWHM) of XRD peaks,  $\theta$  is diffraction  
7 angle,  $\varepsilon$  is the slope of the straight line, representing lattice strain,  $K$  is shape factor  
8 (0.9),  $\lambda$  is wavelength of X-ray source (0.15418 nm) and  $D$  is crystallite size. By linear  
9 fitting  $\beta \cos \theta$  as a function of  $4 \sin \theta$ , the lattice strain and the crystallite size can be

10 derived from the slope ( $\varepsilon$ ) and intercept ( $\frac{K\lambda}{D}$ ) of the fitted line, respectively.

### 11 **Note S2.** Urbach energy calculation

12 Urbach energy ( $E_u$ ) can be calculated from the UV-vis absorption spectra of the  
13 films with this formula<sup>3</sup>:

$$14 \quad \alpha = \alpha_0 \exp(h\nu/E_u) \quad (6)$$

15 Where  $\alpha$  is absorption coefficient ( $\text{cm}^{-1}$ ),  $\alpha_0$  is a constant and  $h\nu$  is photon energy  
16 (eV).

### 17 **Note S3.** Space-charge-limited-current (SCLC) analysis

18 Space charge limited current (SCLC) measurements were performed on hole-only  
19 device based on the FTO/NiO/MAPbI<sub>3</sub>/CE structure and electron-only device based on  
20 the FTO/SnO<sub>2</sub>/MAPbI<sub>3</sub>/PCBM/CE structure, the hole/electron trap state density ( $N_{\text{trap}}$ )  
21 and carrier mobility ( $\mu$ ) of the pristine and F/N-GQDs passivated perovskite films were  
22 quantitatively analyzed. Among them, NiO was prepared and spin-coated following the  
23 literature<sup>4</sup>. The  $N_{\text{trap}}$  of perovskite film can be measured using the following equation<sup>5</sup>:

$$24 \quad N_{\text{trap}} = \frac{2\varepsilon_0\varepsilon_r V_{\text{TFL}}}{qL^2} \quad (1)$$

25 Where  $\varepsilon_0$ ,  $\varepsilon_r$ , and  $L$  are vacuum permittivity, relative permittivity, and the thickness  
26 of the perovskite film, respectively, and  $q$  is elemental charge. And  $\mu$  of the four kinds

1 of perovskite films were calculated using the Mott-Gurney equation<sup>6</sup>:

$$\mu = \frac{8L^3 J_D}{9\epsilon\epsilon_0 V^2} \quad (2)$$

2 Where  $J_D$  is current density and  $V$  is bias voltage.

3 **Note S4.** Thermal admittance spectroscopy (TAS) analysis

4 The trap density ( $N_T$ ) can be estimated from the angular frequency dependent  
5 capacitance using the following equation:

$$N_T(E_\omega) = \frac{V_{bi} dC \omega}{qWd\omega k_B T} \quad (7)$$

6 Where  $V_{bi}$  denotes built-in potential,  $W$  is depletion width,  $C$  is capacitance,  $\omega$  is  
7 frequency,  $k_B$  is Boltzmann constant, and  $T$  is temperature.  $V_{bi}$  and  $W$  are obtained from  
8 the Mott-Schottky plots. The applied angular frequency  $\omega$  defines the energetic  
9 demarcation, according to the following equation<sup>7</sup>:

$$E_\omega = k_B T \ln\left(\frac{\omega_0}{\omega}\right) \quad (8)$$

10 Where  $\omega_0$  is attempt-to-escape frequency.

11 **Note S5.** Time-resolved photoluminescence (TRPL) measurements and the calculation  
12 of carrier lifetimes

13 The TRPL decay curves were fitted using the following biexponential decay  
14 function (ExpDec2)<sup>8</sup>:

$$f(t) = A + B_1 \exp(-t/\tau_1) + B_2 \exp(-t/\tau_2) \quad (3)$$

15 where  $\tau_1$  and  $\tau_2$  represent the carrier lifetimes for fast and slow recombination  
16 processes, and  $B_1$ ,  $B_2$  and  $A$  are fitting parameters, respectively. The average carrier  
17 lifetime ( $\tau_{AVE}$ ) can be calculated according to the following formula<sup>8</sup>:

$$\tau_{AVE} = \frac{\sum B_i \tau_i^2}{\sum B_i \tau_i} \quad (4)$$

18 **Note S6.** Calculation of carrier diffusion length ( $L_D$ )

19 For PSCs,  $L_D$  is another key factor in characterizing the carrier transport ability,  
20 which. We quantified hole diffusion lengths in the perovskite films.  $L_D$  can be  
21



1 estimated according to the 1D diffusion equation<sup>9</sup>:

$$\frac{\tau}{\tau_0} = 1 + \frac{\pi^2}{4} \times \left(\frac{L_D}{L}\right)^2 \quad (5)$$

3 where  $L_D$  is the diffusion length,  $\tau$  and  $\tau_0$  represent the carrier lifetime of the  
4 perovskite film without and with a carbon layer, respectively.

5 **Note S7.** Ultraviolet photoelectron spectroscopy (UPS) analysis

6 The UPS analyse was performed by Thermo Fisher, Escalab 250Xi. He I ( $h\nu =$   
7 21.22 eV) emission source is employed. Figure S14 (left panel) shows the secondary  
8 electron cutoff spectra of all the perovskite films, from which the work function (WF)  
9 can be obtained using the equation<sup>10</sup>:

$$\text{WF} = h\nu - E_{\text{cutoff}}$$

11 where  $h\nu$  is the photoelectron energy of He I light, and  $E_{\text{cutoff}}$  is the secondary  
12 electron cutoff. The valence band maximum (VBM) and conduction band minimum  
13 (CBM) of the perovskite films sample can be calculated by the

$$\text{VBM} = 21.22 \text{ eV} - (E_{\text{cutoff}} - E_{\text{onset}}) \quad (10)$$

$$\text{CBM} = \text{VBM} + E_g \quad (11)$$

16 where the  $E_g$  is the bandgap calculated by UV-vis measurements.

17 **Note S8.** Analysis of the slopes of the normalized  $J$ - $V$  curves at each voltage

18 Ideally, under OC conditions, an almost vertical steep curve represents a rapid  
19 transition from MPP to OC, indicating efficient photocurrent collection. The increased  
20 charge collection at OC is also reflected as charge collection at SC that is less field  
21 dependent, since the highly steep slope near OC indicates desirable charge collection  
22 efficiency even at the low-field regime, showing a field independent charge collection  
23 property<sup>11</sup>. At SC, the charge collection relies on electron-hole pair separation (exciton  
24 dissociation) followed by transport drifting by the internal field. Their slopes at SC  
25 remains nearly unchanged, indicating similar drift transport for all films because of the  
26 presence of a large internal field. In contrast, at OC, the internal field is low and the  
27 charge collection relies more on carrier diffusion. Consequently, any potential insulator

1 or trap states in the active layer or at the interfaces would appreciably deteriorate the  
 2 charge collection efficiency<sup>12</sup>. At the same time, a high  $V_{oc}$  value is also an indication  
 3 of low nonradiative recombination at OC.

4 **Note S9.** Photocurrent density ( $J_{ph}$ ) versus effective voltage ( $V_{eff}$ ) analysis

5  $J_{ph}$  and  $V_{eff}$  are defined as follows:

$$6 \quad J_{ph} = J_L - J_D \quad (13)$$

$$7 \quad V_{eff} = V_0 - V \quad (14)$$

8 where  $J_L$  and  $J_D$  are the current densities under AM 1.5G 100 mW cm<sup>-2</sup>  
 9 illumination and in the dark, respectively.  $V$  is applied voltage, and  $V_0$  is voltage when  
 10  $J_{ph}=0$ . In the lower  $V_{eff}$  region, the  $J_{ph}$  of the four devices increases sharply with the  
 11 increase of  $V_{eff}$ , while in the higher  $V_{eff}$  region,  $J_{ph}$  gradually reaches  $J_{sat}$ , indicating that  
 12 almost all of the excitons can be dissociated into free carriers, and no charge  
 13 recombination occurs before being collected by the electrode. Generally, the saturation  
 14 current density ( $J_{sat}$ ) is related to the maximum exciton generation rate ( $G_{max}$ ), the  $G_{max}$   
 15 of the devices were assessed using the equation of  $G_{max} = J_{sat}/qL$ <sup>13</sup>, where the  $q$  and  $L$   
 16 denote the electronic charge ( $1.6 \times 10^{-19}$  C) and the thicknesses of the film (425 nm in  
 17 this study), respectively. The values of  $G_{max}$  for the Pristine, In-situ, Post, and Dual  
 18 devices are  $1.45 \times 10^{28}$ ,  $1.54 \times 10^{28}$ ,  $1.78 \times 10^{28}$ , and  $2.24 \times 10^{28}$  m<sup>-3</sup> s<sup>-1</sup>, respectively.

19 **Note S10.** Calculations of  $R_s$ ,  $A$  and  $J_0$  from  $J$ - $V$  curves

20 A planar structured PSC can be treated as a single junction diode with a large shunt  
 21 resistance, and its  $J$ - $V$  curve can be described as<sup>14</sup>:

$$22 \quad J = J_{sc} - J_0 \left\{ \exp\left[\frac{e(V + JR_s)}{AK_B T}\right] - 1 \right\} \quad (15)$$

23 where  $J$  is the current flow through the external load,  $J_{sc}$  is photo-induced current  
 24 density,  $J_0$  is dark saturate current density,  $V$  is applied voltage,  $A$  is ideality factor,  $K_B$   
 25 is Boltzmann constant,  $T$  is temperature, and  $e$  is electron charge. Equation (11) can

1 also be transformed into the following equation<sup>14</sup>:

$$2 \quad \frac{dV}{dJ} = \frac{AK_B T}{e} (J_{sc} - J)^{-1} + R_s \quad (16)$$

3  $A$  and  $R_s$  can be obtained from the slope of the  $-dV/dJ$  vs  $(J_{sc}-J)^{-1}$  curves and the  
4 intersection of the curves with the ordinate. Based on to equation (16),  $V_{oc}$  can be  
5 expressed as in the following equation<sup>14</sup>:

$$6 \quad V_{oc} = \frac{AK_B T}{e} \ln \left( \frac{J_{sc}}{J_0} + 1 \right) \quad (17)$$

7 The above equation shows that  $J_0$  and  $A$  can be obtained by fitting the linear part  
8 in region II of the dark  $J$ - $V$  curves.

9 **Note S11.** Open-circuit photovoltage decay (OCVD) measurements

10 First, the device was illuminated at open-circuit for 20 s to achieve the  
11 photostationary state, and when the light was instantaneously switched off, the  
12 photocarriers underwent rapid recombination, the recombination process can be clearly  
13 reflected through the OCVD measurements. And the corresponding electron lifetime  
14 ( $\tau_n$ ) of the devices also can be extracted based on the following formula<sup>15</sup>:

$$15 \quad \tau_n = \frac{K_B T}{e} \left( \frac{dV_{oc}}{dt} \right)^{-1} \quad (12)$$

16 where  $K_B$  is the Boltzmann constant,  $T$  is the absolute temperature,  $e$  is the electron  
17 charge, and  $dV_{oc}/dt$  is the derivative of the open-circuit photovoltage transient.

18

## 5 References for Supporting Information

1. S. Zhong, Z. Li, C. Zheng, X. Luo, J. Gao, X. Lu, X. Gao, L. Shui, S. Wu and J.-M. Liu, *Sol. RRL*, 2022, **6**, 2200088.
2. X. Li, Z. Ying, J. Zheng, X. Wang, Y. Chen, M. Wu, C. Xiao, J. Sun, C. Shou, Z. Yang, Y. Zeng, X. Yang and J. Ye, *Adv. Mater.*, 2023, **35**, 2211962.
3. J. Park, J. Kim, H.-S. Yun, M. J. Paik, E. Noh, H. J. Mun, M. G. Kim, T. J. Shin and S. I. Seok, *Nature*, 2023, **616**, 724–730.
4. Y. Ma, H. Zhang, Y. Zhang, R. Hu, M. Iiang, R. Zhang, H. Lv, J. Tian, L. Chu, J. Zhang, Q. Xue, H.-L. Yip, R. Xia, X. a. Li and W. Huang, *ACS Appl. Mater. Interfaces*, 2019, **11**, 3044-3052.
5. Y. Luo, K. Liu, L. Yang, W. Feng, L. Zheng, L. Shen, Y. Jin, Z. Fang, P. Song, W. Tian, P. Xu, Y. Li, C. Tian, L. Xie and Z. Wei, *Nat. Commun.*, 2023, **14**, 3738-3738.
6. Y. Yang, Y. Wang, Z. Qu, K. Zhang, T. Liang, S. Chen, W. Lv, F. Min, Y. Chen, Y. Qiao and Y. Song, *Angewandte Chemie-International Edition*, 2023, **62**, e202300971.
7. J. A. Hong, M. Jeong, S. Park, A.-Y. Lee, H. S. Kim, S. Jeong, D. W. Kim, S. Cho, C. Yang and M. H. Song, *Adv. Sci.*, 2022, **10**, 2205127.
8. J. Guo, B. Wang, D. Lu, T. Wang, T. Liu, R. Wang, X. Dong, T. Zhou, N. Zheng, Q. Fu, Z. Xie, X. Wan, G. Xing, Y. Chen and Y. Liu, *Adv. Mater.*, 2023, **35**, 2212126.
9. Y. Li, Z. Chen, B. Yu, S. Tan, Y. Cui, H. Wu, Y. Luo, J. Shi, D. Li and Q. Meng, *Joule*, 2022, **6**, 676-689.
10. Z. Iqbal, F. Zu, A. Musiienko, G.-P. Emilio, H. Köbler, T. W. Gries, G. V. Sannino, L. Canil, N. Koch, M. Stolterfoht, D. Neher, M. Pavone, A. B. Muñoz-García, A. Abate and Q. Wang, *ACS Energy Lett.*, 2023, **8**, 4304–4314.
11. J. Li, R. Munir, Y. Fan, T. Niu, Y. Liu, Y. Zhong, Z. Yang, Y. Tian, B. Liu, J. Sun, D.-M. Smilgies, S. Thoroddsen, A. Amassian, K. Zhao and S. F. Liu, *Joule*,

- 2018, **2**, 1313–1330.
12. H. Tsai, R. Asadpour, J.-C. Blancon, C. C. Stoumpos, J. Even, P. M. Ajayan, M. G. Kanatzidis, M. A. Alam, A. D. Mohite and W. Nie, *Nat. Commun.*, 2018, **9**, 2130.
  13. R. K. Gunasekaran, J. Jung, S. W. Yang, J. Yun, Y. Yun, D. Vidyasagar, W. C. Choi, C.-L. Lee, J. H. Noh, D. H. Kim and S. Lee, *Infomat*, 2023, **5**, e12393.
  14. J. You, Y. Yang, Z. Hong, T.-B. Song, L. Meng, Y. Liu, C. Jiang, H. Zhou, W.-H. Chang, G. Li and Y. Yang, *Appl. Phys. Lett.*, 2014, **105**, 183902.
  15. C. Geng, P. Wei, H. Chen, H. Liu, S. Zheng, H. Wang and Y. Xie, *Chem. Eng. J.*, 2021, **414**, 128878.
